# Supplementary material for: α-Endosulfine is a conserved protein required for oocyte meiotic maturation inDrosophila
Source: Oxford University Press journal article supplement (doi:10.1242/dev.025114), 2008-10-17
Supplement: dev025114-sup-025114-tables1.pdf [file dev025114-sup-025114-tables1.pdf]

**Table S1. Quantification of oocytes arrested in prophase and metaphase of meiosis I**

| Strain*                                                           | Percentage of oocytes |                         |                 |                             |              |     |                           |              |     |                            |              |     |          |              |     |
|-------------------------------------------------------------------|-----------------------|-------------------------|-----------------|-----------------------------|--------------|-----|---------------------------|--------------|-----|----------------------------|--------------|-----|----------|--------------|-----|
|                                                                   | Stages 10-12          |                         |                 | Early stage 13 <sup>†</sup> |              |     | Mid stage 13 <sup>†</sup> |              |     | Late stage 13 <sup>†</sup> |              |     | Stage 14 |              |     |
|                                                                   | PI <sup>‡</sup>       | MI <sup>‡</sup>         | Ab <sup>‡</sup> | PI                          | MI           | Ab  | PI                        | MI           | Ab  | PI                         | MI           | Ab  | PI       | MI           | Ab  |
| Control <sup>¶</sup>                                              | 100                   | 0<br>(129) <sup>§</sup> | 0               | 94                          | 6<br>(90)    | 0   | 71                        | 21<br>(98)   | 7.1 | 2.5                        | 93<br>(160)  | 5   | 1        | 94<br>(191)  | 4.7 |
| <i>endos</i> <sup>00003</sup>                                     | 100                   | 0<br>(127)              | 0               | 100                         | 0<br>(61)    | 0   | 90                        | 1.9<br>(103) | 7.8 | 58                         | 6.3<br>(207) | 36  | 4.6      | 2.9<br>(481) | 93  |
| <i>endos</i> <sup>00003</sup> / <i>endos</i> <sup>EY1105</sup>    | 100                   | 0<br>(50)               | 0               | 100                         | 0<br>(37)    | 0   | 98                        | 0<br>(40)    | 2.5 | 76                         | 3.2<br>(63)  | 21  | 6.7      | 0<br>(60)    | 93  |
| <i>endos</i> <sup>00003</sup> / <i>Df(3L)ED4536</i>               | 99                    | 0<br>(89)               | 1.1             | 90                          | 0<br>(29)    | 10  | 96                        | 0<br>(25)    | 4   | 33                         | 1.6<br>(64)  | 66  | 0.8      | 0<br>(124)   | 99  |
| <i>twe</i> <sup>1</sup>                                           | 100                   | 0<br>(128)              | 0               | 92                          | 0.7<br>(142) | 7.7 | 84                        | 11<br>(121)  | 5   | 84                         | 4.3<br>(233) | 12  | 12       | 5.2<br>(229) | 83  |
| <i>twe</i> <sup>1</sup> / <i>Df(2L)RA5</i>                        | 32                    | 0<br>(37)               | 68              | 46                          | 2.3<br>(44)  | 52  | 46                        | 4.4<br>(68)  | 50  | 42                         | 11<br>(65)   | 48  | 13       | 7.3<br>(150) | 80  |
| <i>elgi</i> <sup>EY10782</sup> (Control)                          | 100                   | 0<br>(79)               | 0               | 93                          | 6<br>(84)    | 1   | 60                        | 40<br>(35)   | 0   | 1                          | 98<br>(143)  | 1   | 0        | 98<br>(104)  | 2   |
| <i>elgi</i> <sup>1</sup>                                          | 100                   | 0<br>(139)              | 0               | 84                          | 15<br>(134)  | 1.5 | 40                        | 56<br>(57)   | 3.5 | 5.9                        | 93<br>(119)  | 0.8 | 0        | 97<br>(315)  | 3.1 |
| <i>elgi</i> <sup>1</sup> / <i>elgi</i> <sup>2</sup>               | 100                   | 0<br>(28)               | 0               | 65                          | 34<br>(114)  | 0.9 | 13                        | 87<br>(54)   | 0   | 0.9                        | 99<br>(116)  | 0   | 0        | 98<br>(92)   | 2.2 |
| <i>elgi</i> <sup>1</sup> / <i>Df(3L)brm11</i>                     | 100                   | 0<br>(53)               | 0               | 83                          | 17<br>(30)   | 0   | 35                        | 65<br>(40)   | 0   | 0.9                        | 99<br>(108)  | 0   | 0        | 100<br>(186) | 0.5 |
| <i>endos</i> <sup>00003</sup> <i>elgi</i> <sup>1</sup>            | 100                   | 0<br>(105)              | 0               | 97                          | 0<br>(31)    | 3.2 | 96                        | 0<br>(24)    | 4.2 | 49                         | 1.6<br>(61)  | 49  | 3.3      | 0.8<br>(121) | 96  |
| Control (29°C) <sup>¶</sup>                                       |                       | n.d.                    |                 | 44                          | 51<br>(41)   | 5   | 21                        | 73<br>(66)   | 6   | 1                          | 86<br>(80)   | 13  | 0        | 92<br>(12)   | 8   |
| <i>cdc2</i> <sup>E1-24</sup> / <i>Icdc2</i> <sup>B47</sup> (29°C) | 100                   | 0<br>(100)              | 0               | 100                         | 0<br>(169)   | 0   | 92                        | 3<br>(105)   | 5   | 49                         | 32<br>(250)  | 19  | 4        | 18<br>(626)  | 78  |

\*Experiments were performed at 22-25°C, except where indicated (29°C).

<sup>†</sup>Stage 13 oocytes were categorized as early, mid or late according to the number of nurse cell nuclei present: early stage 13 egg chambers have 11-13 nurse cell nuclei, mid stage 13 egg chambers have 6-10 nurse cell nuclei, and late stage 13 egg chambers have 1-5 nurse cell nuclei.

<sup>‡</sup>PI, prophase I arrest; MI, metaphase I arrest; Ab, abnormal DNA morphology.

<sup>¶</sup>yw females were used as the wild-type control.

<sup>§</sup>The number of oocytes analyzed is shown in parentheses.
